# Supplementary material
Source: publisher site journal article supplement (https://www.spandidos-publications.com/6158/downloadSupplementary)
Supplement: Supplementary file 1 [file downloadSupplementary]

## Sheet: GO+KEGG
Table SIII. GO and KEGG enrichment analysis of the 462 up- and 601 downregulated genes.
1) GO functional enrichment analysis of 462 up-regulated genes (P-value <0.05)
Category	Term	Count	%	P-value	Genes	List Total	Pop Hits	Pop Total	Fold Enrichment	Bonferroni	Benjamini	FDR
GOTERM_BP_DIRECT	GO:0060271~cilium assembly	22	4.91071	9.10586e-09	CEP126, TRAF3IP1, ARL3, CEP19, WDR19, CEP164, SCLT1, RFX3, KIF24, IFT122, RPGR, ATAT1, IFT88, NUDCD3, IFT43, ABLIM3, FAM161A, MKS1, POC1A, IFT27, CEP162, CEP89	404	222	19308	4.73615	1.71735e-05	1.71737e-05	1.71554e-05
GOTERM_BP_DIRECT	GO:0006357~regulation of transcription from RNA polymerase II promoter	61	13.6161	5.63383e-05	ZNF133, ZNF251, ZNF250, HNF4G, CARF, MED11, ZFP30, ZNF805, BCL7A, ZNF83, HNF4A, ZNF41, ZNF525, ZNF765, ZNF202, PKNOX2, KDM2B, MAMSTR, ANXA4, KLF18, RFX3, FOXP4, SUPT3H, FOXP2, ZNF16, TAL1, ZNF836, ZNF438, ZNF711, ZSCAN26, IRF5, ZNF510, HDGFL2, ZSCAN29, ZNF232, ZNF551, ZNF594, MAGED1, FOXK2, ZNF25, ZNF26, BICRA, ZKSCAN7, CUX1, ZNF704, ZNF426, ZNF227, ZNF585B, ZNF664, ZNF343, KDM4C, ZNF182, NFYC, E…	404	1723	19308	1.692	0.100807	0.053127	0.0530707
GOTERM_BP_DIRECT	GO:0006355~regulation of transcription, DNA-templated	38	8.48214	0.000350259	ZNF133, ZNF551, CIITA, ZNF251, MEAF6, ZNF250, MAGED1, OGG1, SETD7, FOXK2, ING1, ZNF26, MTA1, ZKSCAN7, ZFP30, ZNF83, ZNF85, ZNF41, ZNF525, ZNF426, ZNF227, ZNF585B, ZNF202, ZNF664, PKNOX2, ZNF343, DENND4A, NFYC, ESRRB, RFX3, SUPT3H, ZNF618, ZNF836, ZNF711, ZSCAN26, TCF3, ZNF354A, ZNF510	404	976	19308	1.86076	0.483512	0.17472	0.174535
GOTERM_BP_DIRECT	GO:0050790~regulation of catalytic activity	20	4.46429	0.000370562	STARD13, DENND4A, ARHGAP19, CXCL1, CALML4, RPGR, ARHGAP20, ARHGEF9, MMP24, RGS3, MCF2L, PSD3, CCDC88C, ARHGEF3, STXBP5, DOCK2, DEPDC5, RIN2, GPSM3, CTSB	404	375	19308	2.54891	0.502923	0.17472	0.174535
GOTERM_BP_DIRECT	GO:0042073~intraciliary transport	6	1.33929	0.000566512	IFT88, TRAF3IP1, ARL3, IFT122, IFT27, RPGR	404	33	19308	8.68947	0.656561	0.213688	0.213462
GOTERM_BP_DIRECT	GO:1905515~non-motile cilium assembly	7	1.5625	0.00117707	CEP126, IFT88, TBC1D32, MKS1, IFT122, RPGRIP1L, CEP89	404	57	19308	5.8692	0.891527	0.369991	0.369598
GOTERM_BP_DIRECT	GO:0007507~heart development	13	2.90179	0.00226101	MBD1, PDGFB, FN1, DNAAF4, ZDHHC16, BICC1, TGFBR2, CASP7, ADAP2, TBC1D32, CCM2, PDLIM5, CDKL1	404	219	19308	2.83697	0.986005	0.60918	0.608534
GOTERM_BP_DIRECT	GO:0035721~intraciliary retrograde transport	4	0.892857	0.0027682	IFT43, WDR19, IFT122, TTC21A	404	14	19308	13.6549	0.994636	0.630773	0.630104
GOTERM_BP_DIRECT	GO:0051056~regulation of small GTPase mediated signal transduction	9	2.00893	0.00301005	ARHGAP22, ARHGAP20, STARD13, ARHGEF9, SIPA1L1, MCF2L, ARHGEF3, ARHGAP19, DOCK2	404	116	19308	3.70801	0.996605	0.630773	0.630104
GOTERM_BP_DIRECT	GO:0070507~regulation of microtubule cytoskeleton organization	5	1.11607	0.00649878	ATAT1, PHLDB1, TRAF3IP1, TPPP, BICD2	404	36	19308	6.63779	0.999995	1	0.999469
GOTERM_BP_DIRECT	GO:0030198~extracellular matrix organization	10	2.23214	0.00794027	VIT, PRDX4, B4GALT1, TNXB, MMP24, COL5A1, CRISPLD2, COL4A4, COL4A3, GFOD2	404	165	19308	2.89649	1	1	0.999469
GOTERM_BP_DIRECT	GO:0070584~mitochondrion morphogenesis	4	0.892857	0.00907883	OPA1, NUBPL, MTM1, PLEC	404	21	19308	9.10325	1	1	0.999469
GOTERM_BP_DIRECT	GO:0006887~exocytosis	8	1.78571	0.0104604	JAGN1, CADPS, MICAL3, STXBP5, SYTL4, EXOC2, NKD2, CDK16	404	115	19308	3.32467	1	1	0.999469
GOTERM_BP_DIRECT	GO:0001822~kidney development	8	1.78571	0.0130124	IFT88, TRAF3IP1, TBC1D32, ARL3, CNTRL, IFT27, RPGRIP1L, BICC1	404	120	19308	3.18614	1	1	0.999469
GOTERM_BP_DIRECT	GO:1902459~positive regulation of stem cell population maintenance	5	1.11607	0.014202	KDM2B, BCL7A, ESRRB, ING1, BICRA	404	45	19308	5.31023	1	1	0.999469
GOTERM_BP_DIRECT	GO:0030036~actin cytoskeleton organization	10	2.23214	0.0144418	STARD13, TNXB, ABLIM3, NPHP1, PHACTR2, CXCL1, RAC1, DOCK2, PDLIM5, SPTBN2	404	182	19308	2.62594	1	1	0.999469
GOTERM_BP_DIRECT	GO:0006805~xenobiotic metabolic process	7	1.5625	0.0200644	SULT1A1, CYP2U1, GSTO2, HNF4A, SLC22A7, FMO5, BPHL	404	102	19308	3.27985	1	1	0.999469
GOTERM_BP_DIRECT	GO:0009749~response to glucose	6	1.33929	0.0213229	PFKL, APOM, HNF4A, COL4A3, PTK2B, TGFBR2	404	76	19308	3.77306	1	1	0.999469
GOTERM_BP_DIRECT	GO:0048167~regulation of synaptic plasticity	5	1.11607	0.0276679	SIPA1L1, SYNGAP1, NOLC1, PTK2B, CPEB3	404	55	19308	4.34473	1	1	0.999469
GOTERM_BP_DIRECT	GO:0030522~intracellular receptor signaling pathway	4	0.892857	0.0360868	HNF4A, ESRRB, HNF4G, DCBLD2	404	35	19308	5.46195	1	1	0.999469
GOTERM_BP_DIRECT	GO:0045773~positive regulation of axon extension	4	0.892857	0.0360868	SEMA7A, FN1, L1CAM, NTN1	404	35	19308	5.46195	1	1	0.999469
GOTERM_BP_DIRECT	GO:0071498~cellular response to fluid shear stress	3	0.669643	0.0381389	PTK2B, KLF2, PLEC	404	15	19308	9.55842	1	1	0.999469
GOTERM_BP_DIRECT	GO:0061512~protein localization to cilium	4	0.892857	0.0387766	TBC1D32, ARL3, IFT122, TTC21A	404	36	19308	5.31023	1	1	0.999469
GOTERM_BP_DIRECT	GO:0035264~multicellular organism growth	6	1.33929	0.0401993	ERCC1, CCM2, APBA2, KLF2, SPTBN2, PLEC	404	90	19308	3.18614	1	1	0.999469
GOTERM_BP_DIRECT	GO:0007264~small GTPase mediated signal transduction	7	1.5625	0.0414432	RGS19, ARL3, CCDC88C, RAC1, DOCK2, RIN2, RASGRP3	404	121	19308	2.76483	1	1	0.999469
GOTERM_BP_DIRECT	GO:0007368~determination of left/right symmetry	5	1.11607	0.042516	TBC1D32, MKS1, RPGRIP1L, DNAAF4, BICC1	404	63	19308	3.79302	1	1	0.999469
GOTERM_BP_DIRECT	GO:0043249~erythrocyte maturation	3	0.669643	0.0429975	FAM210B, TAL1, KLF2	404	16	19308	8.96101	1	1	0.999469
GOTERM_BP_DIRECT	GO:0000045~autophagosome assembly	5	1.11607	0.0468083	STX12, UBXN2A, ATG13, MTM1, RAB7A	404	65	19308	3.67631	1	1	0.999469
GOTERM_BP_DIRECT	GO:0030030~cell projection organization	5	1.11607	0.0468083	CEP19, NPHP1, MKS1, POC1A, CEP162	404	65	19308	3.67631	1	1	0.999469
GOTERM_BP_DIRECT	GO:0051403~stress-activated MAPK cascade	3	0.669643	0.0480723	DUSP10, CCM2, CRYAB	404	17	19308	8.4339	1	1	0.999469
GOTERM_BP_DIRECT	GO:0035720~intraciliary anterograde transport	3	0.669643	0.0480723	IFT88, TRAF3IP1, IFT27	404	17	19308	8.4339	1	1	0.999469
GOTERM_CC_DIRECT	GO:0005929~cilium	20	4.46429	5.86193e-07	FANK1, TRAF3IP1, ARL3, CEP19, WDR19, MOK, IQCE, IFT122, TTC21A, RPGRIP1L, ADCY6, RPGR, IFT88, IFT43, FAM161A, TBC1D32, NPHP1, IFT27, ROPN1L, CCDC40	419	242	20562	4.0557	0.000245585	0.000140282	0.000137269
GOTERM_CC_DIRECT	GO:0005737~cytoplasm	159	35.4911	9.95921e-07	CEP126, DGKD, CEP19, MYLK3, GLE1, RGS3, TBC1D32, FPGS, GRB10, ROPN1L, CMTR2, PKNOX2, ANGEL2, STARD9, RPGRIP1L, DNAAF4, THOC5, THOC7, ASRGL1, SPATA17, CYP2U1, CEP57L1, HECW2, ZW10, TRIM15, BBOF1, HDGFL2, GTSF1, CDKL1, NDRG4, MAGED1, ARL3, PDGFB, PLD5, ARHGAP19, NOLC1, AK8, AK9, MTM1, SULT1A1, RAP1A, PRDX4, ADAP2, TERT, MAP2, CLEC7A, NPHP1, DPH3, DHX37, G3BP2, INPP5J, TASP1, LPXN, STXBP5, TPPP, PCK…	419	5576	20562	1.39935	0.000417204	0.000140282	0.000137269
GOTERM_CC_DIRECT	GO:0005813~centrosome	31	6.91964	1.00441e-06	CEP126, CTDP1, TRAF3IP1, ARL3, CEP19, CEP164, BICD2, RPGR, GLE1, CNTRL, POC1A, NINL, CCT5, CNTLN, CEP112, TTC12, SCLT1, KIF24, RPGRIP1L, DNAAF4, TTC39A, IFT88, FAM161A, CEP57L1, CCDC88C, CAPRIN2, MKS1, IFT27, CEP162, CEP89, NEK11	419	548	20562	2.77608	0.000420758	0.000140282	0.000137269
GOTERM_CC_DIRECT	GO:0005814~centriole	14	3.125	2.47331e-05	CEP19, STARD9, CEP164, SCLT1, KIF24, GLE1, IFT88, IFT43, MKS1, POC1A, CEP162, CCHCR1, CEP89, CNTLN	419	160	20562	4.29397	0.0103098	0.00259079	0.00253515
GOTERM_CC_DIRECT	GO:0036064~ciliary basal body	13	2.90179	0.000173469	FANK1, TRAF3IP1, CEP19, IFT122, IQCD, RPGRIP1L, RPGR, GLE1, IFT88, FAM161A, MKS1, POC1A, BBOF1	419	168	20562	3.79739	0.0701106	0.0145367	0.0142244
GOTERM_CC_DIRECT	GO:0030991~intraciliary transport particle A	4	0.892857	0.000432913	IFT43, WDR19, IFT122, TTC21A	419	8	20562	24.537	0.165923	0.0297589	0.0291197
GOTERM_CC_DIRECT	GO:0005634~nucleus	154	34.375	0.000497165	DGKD, UBXN2A, MSANTD4, CARF, RGS3, ZFP30, ZNF83, ZNF85, KPNA7, SNRNP35, ZNF202, CMTR2, PKNOX2, LMO1, KDM2B, MAMSTR, STARD9, RFX3, DNAAF4, THOC5, FOXP4, THOC7, ASRGL1, FOXP2, ZNF16, THEG, ZNF836, CLNS1A, ZW10, ZNF438, ZSCAN26, ZNF711, HDGFL2, CDKL1, ZSCAN29, ZNF551, KHDRBS3, MEAF6, MAGED1, ARL3, ARHGAP19, ZNF25, ZNF26, AK9, ARHGAP22, PRDX4, ZMAT1, YBEY, ZKSCAN7, TERT, ZNF704, DPH3, LPXN, ZNF426, T…	419	5984	20562	1.26293	0.188089	0.0297589	0.0291197
GOTERM_CC_DIRECT	GO:0032391~photoreceptor connecting cilium	6	1.33929	0.00124158	FAM161A, ARL3, WDR19, NPHP1, IFT122, RPGRIP1L	419	40	20562	7.3611	0.405804	0.0650278	0.063631
GOTERM_CC_DIRECT	GO:0005829~cytosol	140	31.25	0.00187075	PHLDB1, DGKD, WIPF1, UBXN2A, MYLK3, GLE1, RGS3, SYNGAP1, FPGS, GRB10, KPNA7, TPM4, CISH, FKBPL, RPGRIP1L, DNAAF4, ATG13, THOC7, ASRGL1, IFT88, CLNS1A, ZW10, ZNF438, ZSCAN26, RIN2, NDRG4, PDE1C, ARHGAP19, C9ORF78, AK8, AK9, MTM1, ARHGAP22, SULT1A1, ARHGAP20, RAP1A, PRDX4, TERT, MAP2, NPHP1, DPH3, MAP7, G3BP2, INPP5J, LPXN, STXBP5, TPPP, PCK1, SPTBN2, CNTLN, ATP6V1C2, HEXIM2, STARD13, ACBD5, XRCC4,…	419	5510	20562	1.24689	0.543687	0.0870937	0.0852229
GOTERM_CC_DIRECT	GO:0031514~motile cilium	9	2.00893	0.00256765	IFT88, WDR19, NPHP1, IFT122, IFT27, ROPN1L, IQCD, IQCG, CEP89	419	116	20562	3.80746	0.659461	0.106003	0.103726
GOTERM_CC_DIRECT	GO:0097542~ciliary tip	6	1.33929	0.0028298	IFT88, IFT43, TRAF3IP1, WDR19, IFT122, IFT27	419	48	20562	6.13425	0.694977	0.106003	0.103726
GOTERM_CC_DIRECT	GO:0097730~non-motile cilium	5	1.11607	0.00303587	IFT88, WDR19, IFT122, DNAAF4, CEP89	419	30	20562	8.179	0.72028	0.106003	0.103726
GOTERM_CC_DIRECT	GO:0005874~microtubule	15	3.34821	0.00720152	NUDC, LRRC49, KIF24, ATAT1, DNM3, KIF9, MTA1, OPA1, MAP2, CEP57L1, MAP7, CEP162, TPPP, NINL, CCT5	419	326	20562	2.25801	0.951605	0.23211	0.227125
GOTERM_CC_DIRECT	GO:0036126~sperm flagellum	6	1.33929	0.0123991	KIF9, IFT88, IFT27, AK8, IQCG, RPGR	419	68	20562	4.33006	0.994634	0.371088	0.363117
GOTERM_CC_DIRECT	GO:0097539~ciliary transition fiber	3	0.669643	0.0135029	CEP164, SCLT1, CEP89	419	9	20562	16.358	0.996642	0.377182	0.36908
GOTERM_CC_DIRECT	GO:0097546~ciliary base	5	1.11607	0.0162037	FANK1, CEP126, IFT88, TRAF3IP1, MOK	419	48	20562	5.11187	0.998935	0.424335	0.415221
GOTERM_CC_DIRECT	GO:0002102~podosome	4	0.892857	0.022558	SVIL, KIF9, TPM4, LPXN	419	30	20562	6.5432	0.99993	0.555988	0.544045
GOTERM_CC_DIRECT	GO:0016323~basolateral plasma membrane	11	2.45536	0.0249003	NDRG4, B4GALT1, SLC26A1, HEPH, MEGF11, PDGFB, MAP7, ARRB2, SLC22A7, MUC20, NKD2	419	239	20562	2.25864	0.999974	0.579623	0.567173
GOTERM_CC_DIRECT	GO:0005925~focal adhesion	16	3.57143	0.0280679	LMLN, SVIL, TPM4, ITGA2B, TNC, NEXN, L1CAM, ATAT1, ARHGAP22, AKAP12, PLAU, PTK2B, ITGB8, LPXN, RAC1, PLEC	419	425	20562	1.84749	0.999993	0.618971	0.605676
GOTERM_CC_DIRECT	GO:0005654~nucleoplasm	97	21.6518	0.0326359	HFE, CEP19, DCAF4, ZNF85, KPNA7, SNRNP35, PKNOX2, LMO1, KDM2B, RPGRIP1L, THOC5, THOC7, ZNF16, CLNS1A, ZNF438, ZSCAN26, CDKL1, PIF1, KHDRBS3, MEAF6, ARL3, NOLC1, C9ORF78, AK9, SYCE2, TERT, DPH3, DHX37, ATRIP, BCL9L, CNTLN, HEXIM2, ACBD5, XRCC4, ESRRB, GREB1, MICAL3, ZBTB12, FOSL1, UBLCP1, CAPRIN2, CYB5RL, TCF3, CPEB3, CDK14, CC2D1B, FANK1, KDM5C, PRR7, CIITA, OGG1, CEP164, SETD7, HNF4G, ARRB2, CAS…	419	3963	20562	1.20115	0.999999	0.683723	0.669036
GOTERM_CC_DIRECT	GO:0031410~cytoplasmic vesicle	13	2.90179	0.0348085	DGKD, WIPF1, DENND4A, HFE, ANXA4, CADPS, SLC1A3, ARRB2, BICD2, NKD2, DNM3, RAC1, FGFR1	419	325	20562	1.96296	1	0.694512	0.679594
GOTERM_CC_DIRECT	GO:0015629~actin cytoskeleton	11	2.45536	0.0389937	TRMT10A, SVIL, SIPA1L1, ABLIM3, WIPF1, NEXN, PDLIM5, NTN1, RAB22A, MYLK3, PKNOX2	419	258	20562	2.0923	1	0.742654	0.726702
GOTERM_CC_DIRECT	GO:0005604~basement membrane	6	1.33929	0.0444822	COL5A1, COL4A4, COL4A3, TNC, FN1, NTN1	419	95	20562	3.09941	1	0.768424	0.751918
GOTERM_CC_DIRECT	GO:0030992~intraciliary transport particle B	3	0.669643	0.0458487	IFT88, TRAF3IP1, IFT27	419	17	20562	8.66012	1	0.768424	0.751918
GOTERM_CC_DIRECT	GO:0031092~platelet alpha granule membrane	3	0.669643	0.0458487	ITGA2B, PHACTR2, SYTL4	419	17	20562	8.66012	1	0.768424	0.751918
GOTERM_CC_DIRECT	GO:0031234~extrinsic component of cytoplasmic side of plasma membrane	5	1.11607	0.049623	MCF2L, STAC3, PTK2B, RAC1, CDK16	419	68	20562	3.60838	1	0.799694	0.782517
GOTERM_MF_DIRECT	GO:0046872~metal ion binding	87	19.4196	6.37304e-05	ZNF133, KDM5C, DGKD, ZNF251, ZNF250, ACSM3, GALNT16, ITGA2B, ING1, RNF157, ZFP30, ZNF805, ZNF83, LIPI, ZNF41, FPGS, ZNF85, ZNF525, PMPCA, ZNF765, ZNF202, TRIM66, LMO1, KDM2B, KLF18, CYBB, FOXP4, HDHD2, SYTL4, FOXP2, TGFBR2, ZNF16, ZNF836, ZNF438, ZNF711, ZSCAN26, CRYAB, ZNF510, GTSF1, ZSCAN29, ZNF232, ZNF551, ZNF594, PDE1C, SLC1A3, ZNF25, ZNF26, ADCY6, MTA1, ADAP2, YBEY, ZKSCAN7, ABLIM3, TERT, CL…	411	2643	18869	1.51123	0.0359214	0.0217586	0.0217586
GOTERM_MF_DIRECT	GO:0000978~RNA polymerase II core promoter proximal region sequence-specific DNA binding	48	10.7143	7.58138e-05	ZNF232, ZNF551, ZNF594, ZNF251, ZNF250, HNF4G, FOXK2, CARF, ZNF26, MTA1, ZNF805, ZKSCAN7, ZFP30, ZNF83, ZNF704, HNF4A, ZNF85, ZNF41, ZNF525, ZNF426, ZNF227, ZNF765, ZNF585B, ZNF202, ZNF664, PKNOX2, KDM2B, NFYC, ZNF182, ESRRB, KLF18, RFX3, ZBTB12, FOXP4, FOXP2, KLF2, ZNF16, FOSL1, TAL1, ZNF836, ZNF438, ZNF711, IRF5, ZSCAN26, TCF3, ZNF354A, ZSCAN29, CC2D1B	411	1207	18869	1.82575	0.0425854	0.0217586	0.0217586
GOTERM_MF_DIRECT	GO:0000981~RNA polymerase II transcription factor activity, sequence-specific DNA binding	45	10.0446	0.00172324	ZNF133, ZNF232, ZNF551, ZNF251, ZNF250, HNF4G, FOXK2, ZNF25, CARF, ZNF26, ZNF805, ZKSCAN7, ZFP30, CUX1, ZNF83, HNF4A, ZNF85, ZNF41, ZNF525, ZNF426, ZNF765, ZNF202, ZNF664, PKNOX2, ZNF343, NFYC, ZNF182, ESRRB, KLF18, RFX3, FOXP4, FOXP2, KLF2, ZNF16, FOSL1, ZFP69, TAL1, ZNF711, IRF5, ZSCAN26, TCF3, ZNF354A, ZNF510, ZSCAN29, CC2D1B	411	1280	18869	1.61402	0.628422	0.329714	0.329714
GOTERM_MF_DIRECT	GO:0008017~microtubule binding	14	3.125	0.0056412	TRAF3IP1, OGG1, ARL3, STARD9, KIF24, DNM3, KIF9, FAM161A, OPA1, MAP2, CEP57L1, CCDC88C, TPPP, CRYAB	411	266	18869	2.41631	0.961118	0.809512	0.809512
GOTERM_MF_DIRECT	GO:0005096~GTPase activator activity	13	2.90179	0.0225073	STARD13, ARHGAP19, RASGRP3, ARHGAP22, ARHGAP20, RGS3, SIPA1L1, ADAP2, SYNGAP1, STXBP5, DOCK2, DEPDC5, RIN2	411	285	18869	2.09414	0.999998	1	1
GOTERM_MF_DIRECT	GO:0004693~cyclin-dependent protein serine/threonine kinase activity	4	0.892857	0.0244958	MOK, CDK14, CDK16, CDKL1	411	29	18869	6.33241	0.999999	1	1
GOTERM_MF_DIRECT	GO:0005085~guanyl-nucleotide exchange factor activity	11	2.45536	0.0324374	ARHGEF9, RAP1A, DENND4A, MCF2L, PSD3, CCDC88C, ARHGEF3, DOCK2, RIN2, RASGRP3, RPGR	411	234	18869	2.15816	1	1	1
GOTERM_MF_DIRECT	GO:0043394~proteoglycan binding	3	0.669643	0.0360704	COL5A1, FN1, CTSB	411	14	18869	9.83785	1	1	1
2) GO functional enrichment analysis of 601 down-regulated genes (P-value <0.05)
Category	Term	Count	%	P-value	Genes	List Total	Pop Hits	Pop Total	Fold Enrichment	Bonferroni	Benjamini	FDR
GOTERM_BP_DIRECT	GO:0007399~nervous system development	26	4.40678	0.000133673	HDAC4, CHRNA3, MYT1L, STMN3, RAPGEFL1, SMPD1, ZC3H12A, PCDH1, BRINP3, CER1, APC2, MEF2C, RBFOX1, SEMA6A, RBFOX3, APAF1, BDNF, SEMA6D, NTRK3, FZD9, NR2F1, ISLR2, ARHGAP26, TTLL7, GJB1, TPP1	514	415	19308	2.35342	0.292654	0.346213	0.346213
GOTERM_BP_DIRECT	GO:0016126~sterol biosynthetic process	5	0.847458	0.00112047	CYB5R2, SQLE, MSMO1, HMGCR, FDFT1	514	18	19308	10.4345	0.945178	1	1
GOTERM_BP_DIRECT	GO:0009314~response to radiation	6	1.01695	0.00124574	CXCL12, BCL2, OPRM1, PRDM1, SOD2, FOXP3	514	31	19308	7.27049	0.960383	1	1
GOTERM_BP_DIRECT	GO:0006695~cholesterol biosynthetic process	6	1.01695	0.00280461	IDI1, MVK, MSMO1, DHCR24, HMGCR, FDFT1	514	37	19308	6.09149	0.999307	1	1
GOTERM_BP_DIRECT	GO:0007009~plasma membrane organization	5	0.847458	0.0034302	FER1L5, CR1, OTOF, FER1L6, SPTBN1	514	24	19308	7.82588	0.999864	1	1
GOTERM_BP_DIRECT	GO:0002221~pattern recognition receptor signaling pathway	4	0.677966	0.00437159	LACC1, NOD1, NOD2, MEFV	514	13	19308	11.5582	0.999988	1	1
GOTERM_BP_DIRECT	GO:0032703~negative regulation of interleukin-2 production	5	0.847458	0.00607942	CR1, HOMER2, LAPTM5, NOD2, FOXP3	514	28	19308	6.70789	1	1	1
GOTERM_BP_DIRECT	GO:0043407~negative regulation of MAP kinase activity	6	1.01695	0.00661042	CD300A, SMPD1, SPRY4, NF1, HMGCR, SH2B3	514	45	19308	5.00856	1	1	1
GOTERM_BP_DIRECT	GO:0032496~response to lipopolysaccharide	11	1.86441	0.00932946	GCH1, CSF1, ABCC8, PTGER2, CYP1A2, CYP1A1, OPRM1, SOD2, SMAD6, FOXP3, PTGES	514	157	19308	2.63189	1	1	1
GOTERM_BP_DIRECT	GO:0045429~positive regulation of nitric oxide biosynthetic process	6	1.01695	0.00946484	DDAH1, HBB, TRPV1, OPRM1, TLR6, SOD2	514	49	19308	4.5997	1	1	1
GOTERM_BP_DIRECT	GO:0009615~response to virus	9	1.52542	0.00955423	ISG20, IFITM1, CXCL12, SMPD1, CYP1A1, FOXP3, IFIT3, IFIT2, OASL	514	111	19308	3.04575	1	1	1
GOTERM_BP_DIRECT	GO:0009791~post-embryonic development	7	1.18644	0.011405	CHST11, CYP1A2, BCL2, ARID5B, PLAGL2, PRDM1, SOD2	514	71	19308	3.70351	1	1	1
GOTERM_BP_DIRECT	GO:0042493~response to drug	16	2.71186	0.0121069	TGIF1, HDAC4, RPH3AL, MCM7, ABCC8, PDX1, AK4, SOD2, PPOX, LRP8, CCND1, SMPD1, CYP1A1, BCL2, TXNIP, PAM	514	293	19308	2.05129	1	1	1
GOTERM_BP_DIRECT	GO:0007186~G-protein coupled receptor signaling pathway	38	6.44068	0.0125603	VIPR1, OR10J3, OR2G3, PTGER2, PIK3CG, RAPGEFL1, HCAR2, RGS4, ADGRG4, TMEM145, ADGRG2, OR8B8, RHO, OR4A47, NTSR2, GPR135, OR2B3, OR5AU1, OR4D2, OR8H1, MAS1L, RPH3AL, TPRA1, GPR15, OR1L8, OR6C75, FZD9, OR6N1, FRS2, OR10AD1, GPR141, CXCL12, LPAR5, ADGRB3, PLCB2, LGR5, OR7G3, OR4A16	514	947	19308	1.50733	1	1	1
GOTERM_BP_DIRECT	GO:0080135~regulation of cellular response to stress	3	0.508475	0.0135415	OPRM1, SLC38A2, CORO2B	514	7	19308	16.0989	1	1	1
GOTERM_BP_DIRECT	GO:0010951~negative regulation of endopeptidase activity	10	1.69492	0.0161594	OPRPN, SERPINA1, SERPINB13, PAPLN, CPAMD8, FETUB, SPP2, A2ML1, TFPI, SERPINA4	514	146	19308	2.57289	1	1	1
GOTERM_BP_DIRECT	GO:0048643~positive regulation of skeletal muscle tissue development	3	0.508475	0.0177403	MEF2C, SHH, HMGCR	514	8	19308	14.0866	1	1	1
GOTERM_BP_DIRECT	GO:0070268~cornification	3	0.508475	0.0177403	CERS3, CYP26B1, LIPK	514	8	19308	14.0866	1	1	1
GOTERM_BP_DIRECT	GO:0035335~peptidyl-tyrosine dephosphorylation	5	0.847458	0.0178088	DUSP4, DUSP22, PTPRZ1, UBASH3B, DUSP16	514	38	19308	4.94266	1	1	1
GOTERM_BP_DIRECT	GO:0008360~regulation of cell shape	10	1.69492	0.0228763	FMNL3, PRAG1, EPB41, TPM1, LST1, SHROOM3, ITGA7, ATP10A, PLXNC1, BRWD3	514	155	19308	2.4235	1	1	1
GOTERM_BP_DIRECT	GO:0050665~hydrogen peroxide biosynthetic process	3	0.508475	0.0275283	CYP1A2, CYP1A1, SOD2	514	10	19308	11.2693	1	1	1
GOTERM_BP_DIRECT	GO:0060907~positive regulation of macrophage cytokine production	4	0.677966	0.0277918	LAPTM5, NOD1, NOD2, HLA-G	514	25	19308	6.01027	1	1	1
GOTERM_BP_DIRECT	GO:0032731~positive regulation of interleukin-1 beta production	6	1.01695	0.0291146	NOD1, TLR6, NOD2, MEFV, AGER, MALT1	514	65	19308	3.46746	1	1	1
GOTERM_BP_DIRECT	GO:0051924~regulation of calcium ion transport	4	0.677966	0.0308131	RGS4, SLN, EPB41, BCL2	514	26	19308	5.77911	1	1	1
GOTERM_BP_DIRECT	GO:0048468~cell development	4	0.677966	0.0308131	SHH, DCT, IRX4, ARID5B	514	26	19308	5.77911	1	1	1
GOTERM_BP_DIRECT	GO:0032689~negative regulation of interferon-gamma production	5	0.847458	0.0311254	CR1, ZC3H12A, LAPTM5, NOD2, FOXP3	514	45	19308	4.1738	1	1	1
GOTERM_BP_DIRECT	GO:0071374~cellular response to parathyroid hormone stimulus	3	0.508475	0.0330626	HDAC4, MEF2C, CSF1	514	11	19308	10.2448	1	1	1
GOTERM_BP_DIRECT	GO:0009268~response to pH	3	0.508475	0.0330626	ABCC8, PAM, ARSB	514	11	19308	10.2448	1	1	1
GOTERM_BP_DIRECT	GO:0007166~cell surface receptor signaling pathway	15	2.54237	0.03416	MAGI1, FCRL1, IFITM1, VIPR1, SEMA6A, FZD9, LILRA1, TRPV1, AGER, SIRPB1, ADGRG4, ADGRG2, ADGRB3, CD28, NTSR2	514	305	19308	1.84742	1	1	1
GOTERM_BP_DIRECT	GO:0048015~phosphatidylinositol-mediated signaling	5	0.847458	0.0382278	PDGFRA, PLCZ1, PLCH2, PLCB2, PIK3CG	514	48	19308	3.91294	1	1	1
GOTERM_BP_DIRECT	GO:0006739~NADP metabolic process	3	0.508475	0.0389891	PC, TP53I3, IDH1	514	12	19308	9.39105	1	1	1
GOTERM_BP_DIRECT	GO:0008299~isoprenoid biosynthetic process	3	0.508475	0.0389891	IDI1, MVK, HMGCR	514	12	19308	9.39105	1	1	1
GOTERM_BP_DIRECT	GO:0035457~cellular response to interferon-alpha	3	0.508475	0.0452832	FCAR, IFIT3, IFIT2	514	13	19308	8.66866	1	1	1
GOTERM_BP_DIRECT	GO:0007417~central nervous system development	9	1.52542	0.0472114	RPS6KA6, SHH, VCAN, PTPRZ1, PDX1, TPP1, PAM, SPTBN1, ARSB	514	150	19308	2.25385	1	1	1
GOTERM_BP_DIRECT	GO:0043085~positive regulation of catalytic activity	4	0.677966	0.0483673	PSEN2, BCL2, PIK3CG, DCP1B	514	31	19308	4.84699	1	1	1
GOTERM_BP_DIRECT	GO:0006954~inflammatory response	18	3.05085	0.0499222	HDAC4, CSF1, PTGER2, CD180, NOD1, MEFV, AGER, FOXP3, PIK3CG, TMIGD3, LACC1, IL1RL2, CYP26B1, FASN, ZC3H12A, STAB1, TLR6, CCR3	514	412	19308	1.64115	1	1	1
GOTERM_CC_DIRECT	GO:0016021~integral component of membrane	204	34.5763	1.43089e-09	VIPR1, IFITM1, LST1, PKD2L2, HS6ST2, ZDHHC4, SMCO3, MFSD2B, OR8H1, ENTPD1, ISLR2, HLA-G, TMEM170A, OR10AD1, RUNX1, FCAMR, PPP1R3F, PLPP4, IFI27, SOAT1, ADGRB3, KCNQ3, ADPRM, FREM1, FREM2, PTGES, EPB41, IGSF1, LY9, KIAA0040, CYB5R2, CHST11, OTOF, ST3GAL6, HLA-DQA2, FDFT1, FER1L5, GPR15, CADM2, SIGLEC12, KIR2DS4, FZD9, FER1L6, GPR137C, SQLE, XKR9, GJB1, LPAR5, CD28, GALNTL6, TMCC1, PAM, MRAP2, XKR5…	535	5415	20562	1.44792	5.95252e-07	5.95252e-07	5.95252e-07
GOTERM_CC_DIRECT	GO:0005886~plasma membrane	178	30.1695	4.88569e-06	CPNE9, VIPR1, IFITM1, CSF1, TTLL10, LST1, RAPH1, RXFP4, MSMO1, RAPGEFL1, ZDHHC4, CDH7, RGS4, RASSF2, CAPNS2, PLXNC1, MAGI1, KCNH2, PDGFRA, OR8H1, ENTPD1, TPRA1, USP6, CD300A, SEMA6D, CD180, ISLR2, FRS2, HLA-G, FRS3, SYTL3, OR10AD1, SYTL2, OSCAR, FCAMR, PLPP4, ADGRB3, KCNQ3, ABCG4, AJUBA, FREM2, CHRNA3, ARL6, EPB41, CDCA4, NTM, PSEN2, LYPD5, AGER, LPP, LY9, RASGRP4, HCAR2, SLCO1B1, KCNV1, TPO, ADG…	535	5071	20562	1.34908	0.00203039	0.00101622	0.00101622
GOTERM_CC_DIRECT	GO:0005887~integral component of plasma membrane	63	10.678	0.000219608	KCNK6, VIPR1, STAB2, RXFP4, FCAR, SIRPB1, LMBR1, STAB1, SLC16A6, PLXNC1, MFSD2B, CCR3, FCRL1, KCNH2, OR4D2, PDGFRA, ENTPD1, SEMA6A, CR1, MMD, SEMA6D, ATP1B4, FRS2, OPRM1, TMIGD3, SLC7A8, ADGRB3, CDHR1, KCNQ3, TLR6, IL9R, OR4A16, CHRNA3, PTGER2, PSEN2, ATP10A, AGER, DLL1, KCNV1, SLCO1B1, ADGRG4, TPO, IL1RL2, ADGRG2, PTPRZ1, HRH2, RHO, OR4A47, SLC38A6, PCDH1, GABRD, SLC38A2, HLA-DQA2, NTSR2, NLGN4Y…	535	1508	20562	1.60565	0.0873172	0.0304523	0.0304523
GOTERM_CC_DIRECT	GO:0005777~peroxisome	9	1.52542	0.00885297	PECR, LACC1, IDI1, ABCD2, MVK, PEX11A, IDH1, CCDC33, SYT7	535	112	20562	3.08842	0.975258	0.905029	0.905029
GOTERM_CC_DIRECT	GO:0005789~endoplasmic reticulum membrane	41	6.94915	0.0108777	ANKRD13C, PIGN, PSEN2, TOR1AIP2, MSMO1, ATP10A, HMGCR, JPH1, LCLAT1, ZDHHC4, CYP17A1, CYB5R2, SHH, CYP26B1, OTOF, FDFT1, CERS3, PDGFRA, SFTPB, SLC37A2, IRGC, CYP3A43, FZD9, DHCR24, ELOVL7, TMEM170A, SGPP1, SQLE, GJB1, PITPNM1, IFI27, SOAT1, JKAMP, CYP1A2, CYP1A1, ATP13A4, BCL2, TMCC1, CNIH2, MRAP2, PTGES	535	1054	20562	1.49505	0.989432	0.905029	0.905029
GOTERM_CC_DIRECT	GO:0016020~membrane	84	14.2373	0.0170593	SLC44A5, MTCH1, IFITM1, SLC44A4, CSF1, MCM7, PIGN, LST1, ELAVL4, MSMO1, PKD2L2, LCLAT1, PIK3CG, RAPGEFL1, OASL, HID1, CCND1, ABHD16A, SLC16A6, PLXNC1, MAGI1, PDGFRA, ENTPD1, PIANP, ABCC8, CD300A, MMD, FRS2, PEX2, C20ORF173, HLA-G, FRS3, SYTL2, TMIGD3, PPP1R3F, VCAN, PITPNM1, SOAT1, CDHR1, IL3RA, ITGA7, NDUFS1, RBM23, ABCG4, IL9R, PTGES, SLC47A2, ARL6, IGSF1, PSEN2, TOR1AIP2, ADD3, AGER, LRP8, RAS…	535	2547	20562	1.26754	0.999221	1	1
GOTERM_CC_DIRECT	GO:0005778~peroxisomal membrane	6	1.01695	0.0317224	PECR, ABCD2, PEX11A, PEX2, HMGCR, SYT7	535	68	20562	3.3912	0.999999	1	1
GOTERM_CC_DIRECT	GO:0098794~postsynapse	8	1.35593	0.0330344	APC2, MEF2C, ADGRB3, CAPRIN1, CELF4, FZD9, AGER, ZDHHC15	535	117	20562	2.62794	0.999999	1	1
GOTERM_CC_DIRECT	GO:0005794~Golgi apparatus	41	6.94915	0.0352865	SPAG17, SERPINA1, TNKS, ICA1L, LST1, PSEN2, STMN3, DPY30, ZDHHC21, NOD2, HID1, ZDHHC4, SHH, RASSF2, MGAT5, RHO, ST3GAL6, ARSB, APC2, PDGFRA, MPIG6B, RNF24, MMD, PCGF5, GDF15, SEMA6D, RAB3IP, FZD9, OPRM1, SMAD6, COQ6, ZDHHC15, FMNL3, FASN, TPP1, GALNTL6, TLR6, CRELD2, PLCB2, AJUBA, LGR5	535	1141	20562	1.38105	1	1	1
GOTERM_CC_DIRECT	GO:0009986~cell surface	25	4.23729	0.0458317	PSEN2, NOD2, TFPI, LY9, AGER, LRP8, SIRPB1, TPO, SHH, ADGRG2, SCN5A, ARSB, FCRL1, NLGN4Y, KCNH2, FGFBP1, CR1, SEMA6D, FZD9, ISLR2, OSCAR, KCNQ3, CD28, ITGA7, PAM	535	639	20562	1.50366	1	1	1
GOTERM_CC_DIRECT	GO:0005759~mitochondrial matrix	17	2.88136	0.0483217	PDHA2, ACSS2, HSPA1L, MMAB, OGDHL, AK4, TFB1M, SOD2, GLUD1, PC, LYRM4, FTMT, ALDH2, LYRM7, MTHFD2L, NDUFS1, TEFM	535	389	20562	1.67962	1	1	1
GOTERM_MF_DIRECT	GO:0005509~calcium ion binding	37	6.27119	0.00141311	FBN2, DNAH7, CIB4, STAB2, PKD2L2, DLL1, LRP8, FSTL4, RASGRP4, NCALD, CDH7, TPO, SHH, PLCZ1, SPATA21, CAPNS2, STAB1, OTOF, PCDH1, FER1L5, GCH1, PLA2G4E, SUSD1, SYT7, RUNX1, CAPN13, VCAN, PITPNM1, S100Z, CDHR1, PLA2G10, CRELD1, PLCH2, ITGB1BP2, CRELD2, PAM, PLCB2	533	751	18869	1.74415	0.670931	0.614428	0.614428
GOTERM_MF_DIRECT	GO:0004866~endopeptidase inhibitor activity	7	1.18644	0.00156343	OPRPN, SPINK1, CPAMD8, FETUB, SPP2, A2ML1, TFPI	533	45	18869	5.5069	0.707654	0.614428	0.614428
GOTERM_MF_DIRECT	GO:0016491~oxidoreductase activity	14	2.37288	0.0184319	PECR, AKR1E2, MSMO1, TECRL, PPOX, COQ6, CYP17A1, CYB5R2, CYP26B1, TP53I3, DCT, FASN, CYP1A2, CYP1A1	533	239	18869	2.07373	1	1	1
GOTERM_MF_DIRECT	GO:0004888~transmembrane signaling receptor activity	12	2.0339	0.0185353	FCAMR, TMIGD3, FCRL1, CHRNA3, LMBR1, CD300A, LILRA1, TRPV1, TLR6, AGER, LGR5, LRP8	533	189	18869	2.24771	1	1	1
GOTERM_MF_DIRECT	GO:0101020~estrogen 16-alpha-hydroxylase activity	3	0.508475	0.0198482	CYP3A43, CYP1A2, CYP1A1	533	8	18869	13.2756	1	1	1
GOTERM_MF_DIRECT	GO:0004497~monooxygenase activity	7	1.18644	0.020263	CYP26B1, CYP3A43, CYP1A2, CYP1A1, PAM, COQ6, CYP17A1	533	76	18869	3.26066	1	1	1
GOTERM_MF_DIRECT	GO:0016787~hydrolase activity	15	2.54237	0.0224963	HDAC4, IDI1, DDX59, ENTPD1, SPO11, FAHD2B, VNN2, ABHD16A, SMPD1, AFMID, ZC3H12A, SPAG1, RAD54L2, ADPRM, DCP1B	533	272	18869	1.95229	1	1	1
GOTERM_MF_DIRECT	GO:0004867~serine-type endopeptidase inhibitor activity	8	1.35593	0.0265306	SERPINA1, SPINK1, SERPINB13, PAPLN, CPAMD8, A2ML1, TFPI, SERPINA4	533	103	18869	2.74963	1	1	1
GOTERM_MF_DIRECT	GO:0015026~coreceptor activity	5	0.847458	0.0300533	FCRL1, GPR15, IGSF1, CD28, RGMB	533	42	18869	4.21446	1	1	1
GOTERM_MF_DIRECT	GO:0005528~FK506 binding	3	0.508475	0.0307333	FKBP1B, NFATC1, FKBP3	533	10	18869	10.6205	1	1	1
GOTERM_MF_DIRECT	GO:0005516~calmodulin binding	12	2.0339	0.0317441	RGS4, USP6, ARPP21, EPB41, MYO3A, KCNQ3, ATP2B3, TRPV1, SCN5A, ADD3, SPTBN1, SYT7	533	205	18869	2.07228	1	1	1
GOTERM_MF_DIRECT	GO:0004725~protein tyrosine phosphatase activity	8	1.35593	0.0317755	DUSP4, DUSP22, PTP4A2, PTPRZ1, UBASH3B, DUSP16, SSH1, PTPN3	533	107	18869	2.64684	1	1	1
GOTERM_MF_DIRECT	GO:0070410~co-SMAD binding	3	0.508475	0.0434366	TGIF1, USP9Y, SMAD6	533	12	18869	8.85038	1	1	1
GOTERM_MF_DIRECT	GO:0042802~identical protein binding	61	10.339	0.0468838	ZNF572, SERPINA1, CSF1, PRAG1, DPY30, PIK3CG, PPCDC, IFIT3, BOLL, UBASH3B, SKP2, KCNH2, APAF1, GPX3, TPM1, RGMB, HLA-G, FRS3, PLPP4, IFI27, SOAT1, TLR6, ABCG4, KCTD15, GAS7, HDAC4, MVK, NOD1, HMGCR, MEFV, AGER, MALT1, KCTD21, PPCS, GBP3, GCH1, TPK1, HOMER2, IDH1, RAB3IP, ESRRG, TRPV1, KCNRG, SNCAIP, SOD2, SMAD6, NMRAL1, GLUD1, GJB1, PC, PSAT1, ERCC4, FASN, EIF3J, CD28, BCL2, CCDC6, TMCC1, MAP3K13…	533	1714	18869	1.25991	1	1	1
3) KEGG pathway enrichment analysis of 462 up-regulated genes (P-value <0.05)
Category	Term	Count	%	P-value	Genes	List Total	Pop Hits	Pop Total	Fold Enrichment	Bonferroni	Benjamini	FDR
KEGG_PATHWAY	hsa05168:Herpes simplex virus 1 infection	24	5.35714	9.88705e-05	ZNF133, ZNF551, ZNF251, ZNF250, ZNF182, IRAK4, ZNF25, ZNF26, ZFP69, C5, ZNF805, ZFP30, ZNF83, ZNF836, ZNF41, ZNF85, ZNF426, HLA-DRA, ZNF227, ZNF765, ZNF585B, ZNF354A, ZNF510, ZNF343	162	495	8164	2.4434	0.0263431	0.026695	0.026695
KEGG_PATHWAY	hsa04510:Focal adhesion	11	2.45536	0.0063238	RAP1A, TNXB, COL4A4, COL4A3, ITGA2B, PDGFB, TNC, FN1, ITGB8, RAC1, MYLK3	162	201	8164	2.75794	0.819648	0.690834	0.690834
KEGG_PATHWAY	hsa04512:ECM-receptor interaction	7	1.5625	0.00767593	TNXB, COL4A4, COL4A3, ITGA2B, TNC, FN1, ITGB8	162	88	8164	4.0087	0.875132	0.690834	0.690834
KEGG_PATHWAY	hsa04360:Axon guidance	9	2.00893	0.0273554	ROBO2, SEMA5B, SEMA7A, RGS3, ABLIM3, NTN4, RAC1, L1CAM, NTN1	162	182	8164	2.49206	0.999441	1	1
KEGG_PATHWAY	hsa04933:AGE-RAGE signaling pathway in diabetic complications	6	1.33929	0.0473159	COL4A4, COL4A3, FN1, CYBB, RAC1, TGFBR2	162	100	8164	3.0237	0.999998	1	1
4) KEGG pathway enrichment analysis of 601 down-regulated genes (P-value <0.05)
Category	Term	Count	%	PValue	Genes	List Total	Pop Hits	Pop Total	Fold Enrichment	Bonferroni	Benjamini	FDR
KEGG_PATHWAY	hsa00100:Steroid biosynthesis	5	0.847458	0.00316539	SQLE, SOAT1, MSMO1, DHCR24, FDFT1	259	20	8164	7.88031	0.60377	0.612268	0.612268
KEGG_PATHWAY	hsa01100:Metabolic pathways	67	11.3559	0.00419362	PIGN, MSMO1, OGDHL, LCLAT1, PIK3CG, PPCDC, CYP26B1, PLCZ1, ALDH2, ABHD16A, SMPD1, L3HYPDH, CERS3, ENTPD1, GPX3, PLA2G4E, GPX8, ELOVL7, DCT, MTHFD2L, PLA2G10, ACSBG1, NDUFS1, ADPRM, PLCB2, SPAM1, GNE, PTGES, IDI1, ACSS2, MVK, AK4, HMGCR, PPOX, CYP17A1, TPO, PPCS, MGAT5, AFMID, ST3GAL6, PIP5K1B, GPAT2, ARSB, FDFT1, PDHA2, GCH1, TPK1, MMAB, AGL, IDH1, DHCR24, SGPP1, COQ6, LACC1, SQLE, GLUD1, HAL, MG…	259	1540	8164	1.37138	0.706862	0.612268	0.612268
KEGG_PATHWAY	hsa01240:Biosynthesis of cofactors	12	2.0339	0.00904423	GCH1, ALDH2, PSAT1, TPK1, PPCS, MMAB, AFMID, MTHFD2L, AK4, PPOX, PPCDC, COQ6	259	153	8164	2.47225	0.929556	0.880305	0.880305
KEGG_PATHWAY	hsa00770:Pantothenate and CoA biosynthesis	4	0.677966	0.0272391	ALDH2, VNN2, PPCS, PPCDC	259	21	8164	6.00404	0.999685	1	1
KEGG_PATHWAY	hsa04146:Peroxisome	7	1.18644	0.0447287	PECR, ABCD2, MVK, PEX11A, IDH1, PEX2, SOD2	259	82	8164	2.69084	0.999998	1	1
